# Supplementary material
Source: MDPI journal article supplement (https://www.mdpi.com/1099-4300/18/3/83)

**Supplementary Data 2** List of test model and their secondary structures of RNA-RNA interaction models used for tool assessment

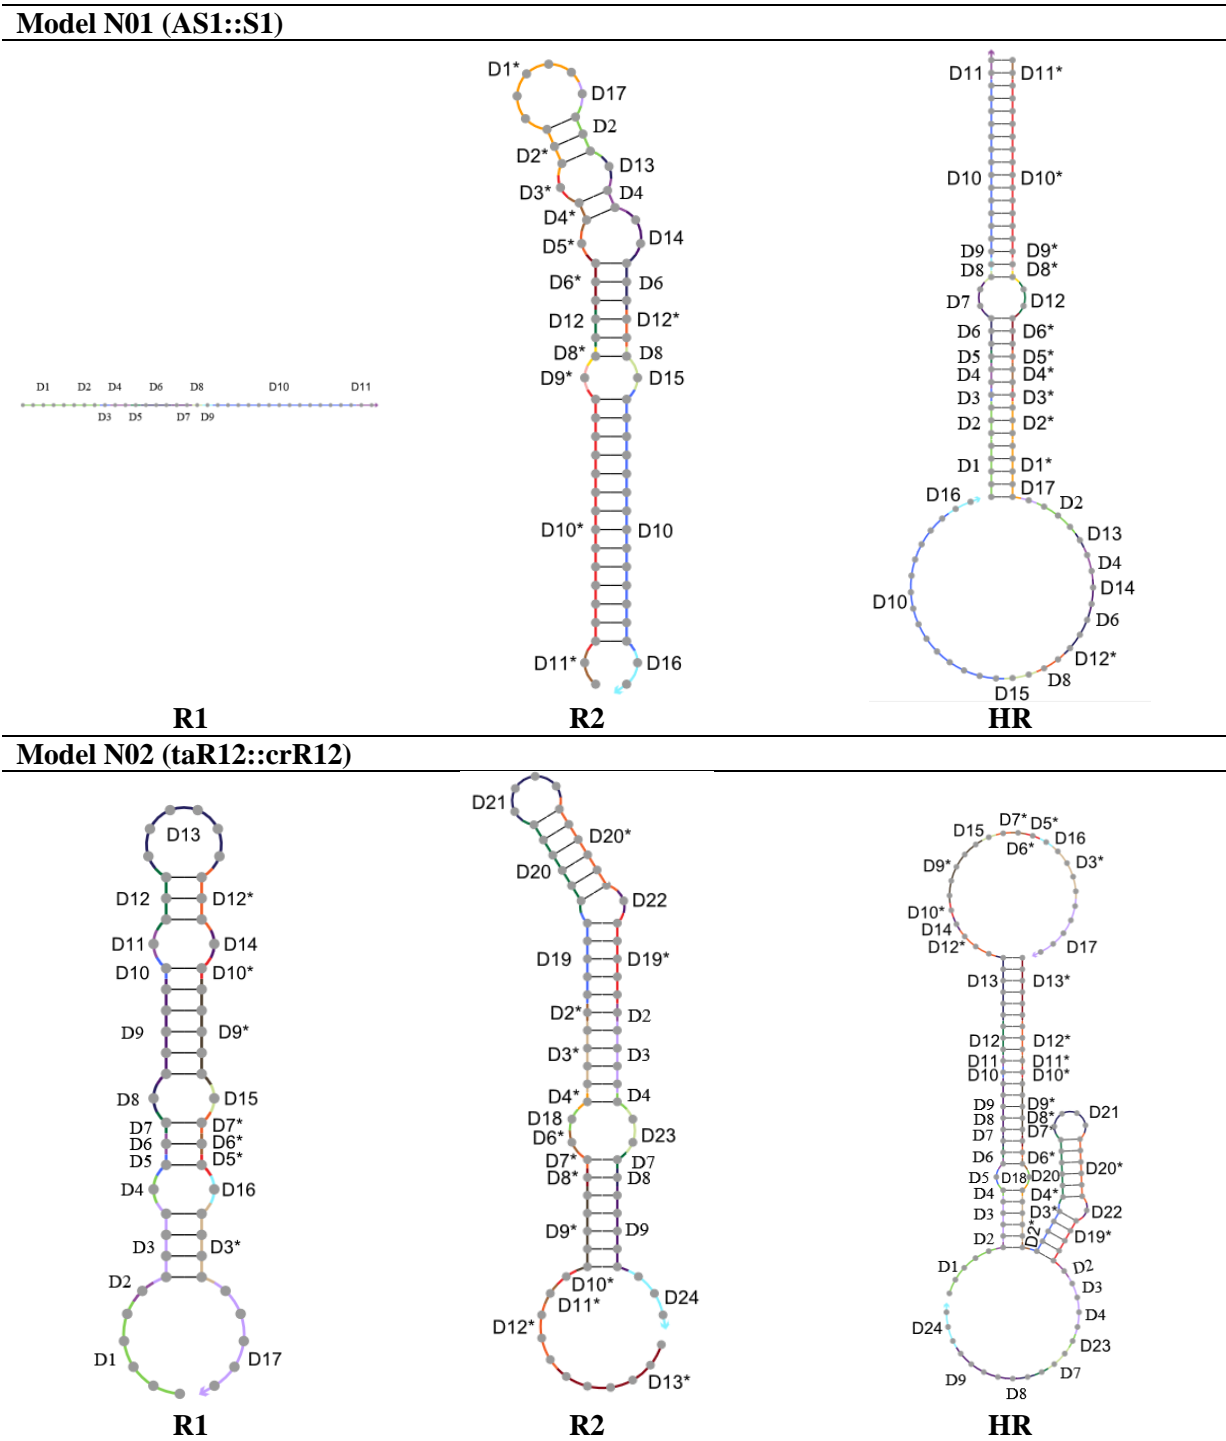

---

**Model N03 (DsrA::mreB)**


---

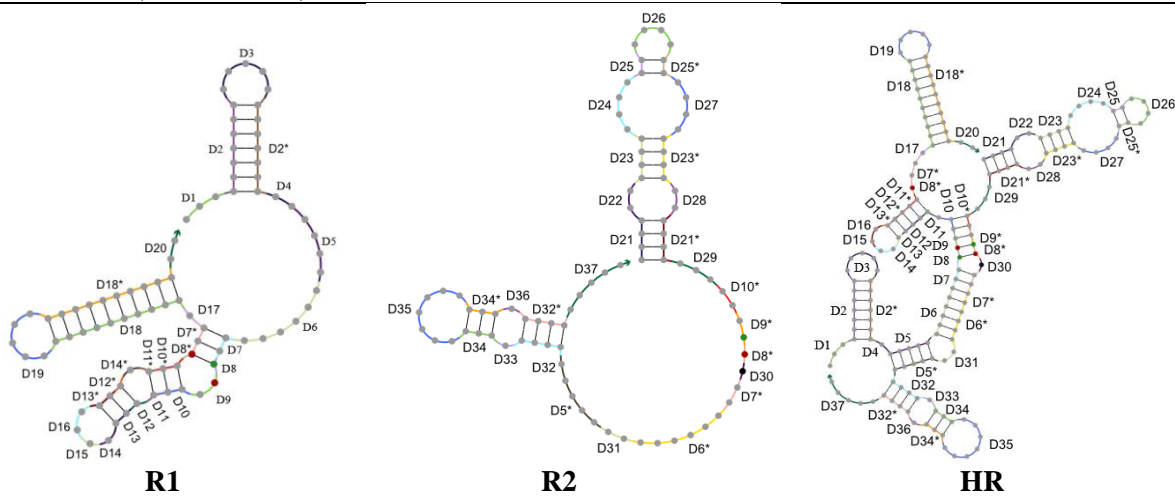


---

**Model N04 (RyhB::SodB)**


---

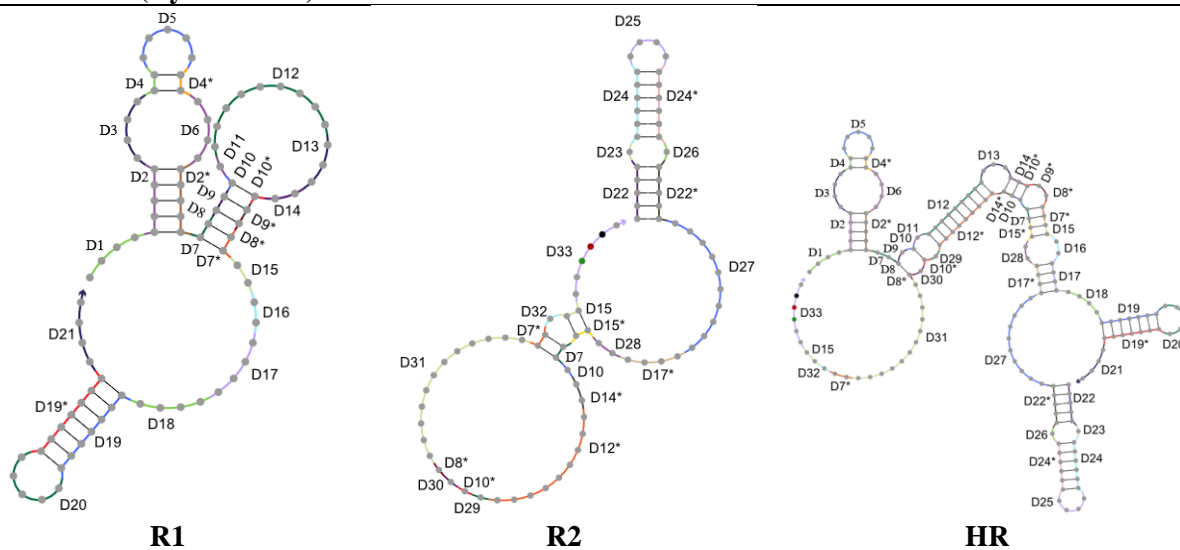


---

**Model N05 (FinP::traJ)**


---

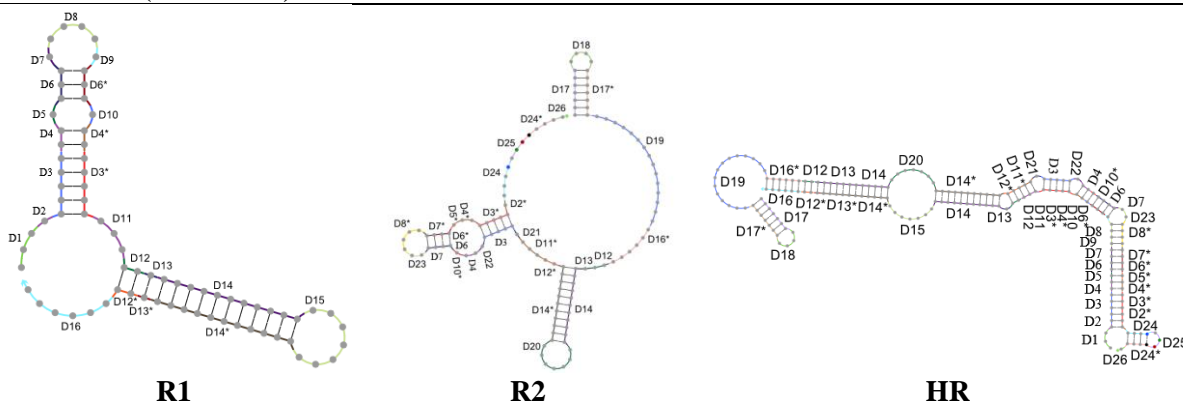

---

**Model N06 (MicA::ompA)**


---

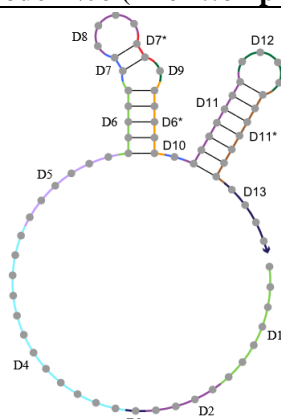**R1**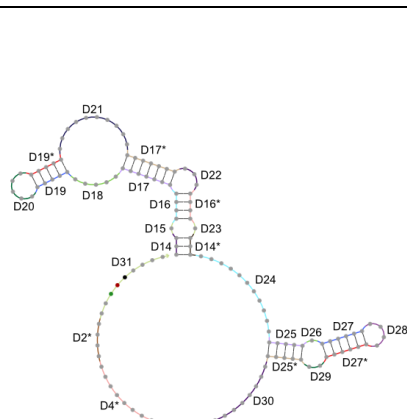**R2**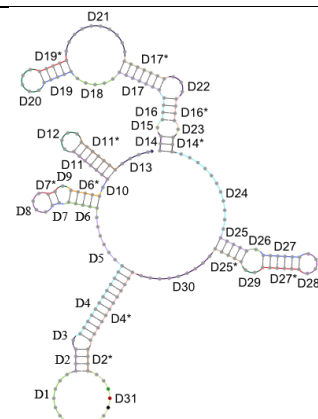**HR**


---

**Model N07 (DsrA::Rpos)**


---

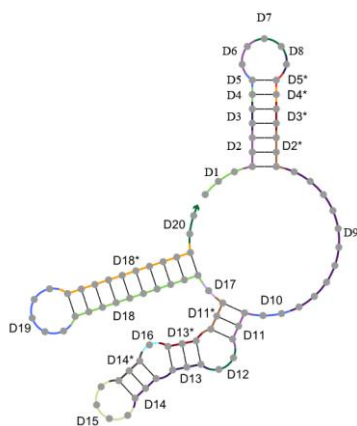**R1**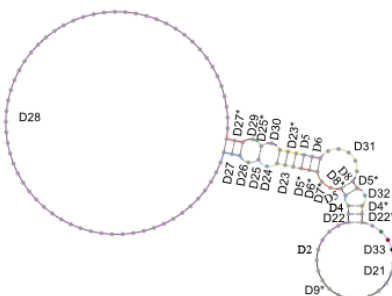**R2**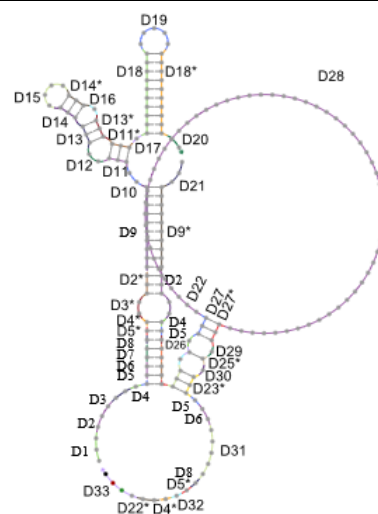**HR**

---

**Model A01 (Simple model)**


---

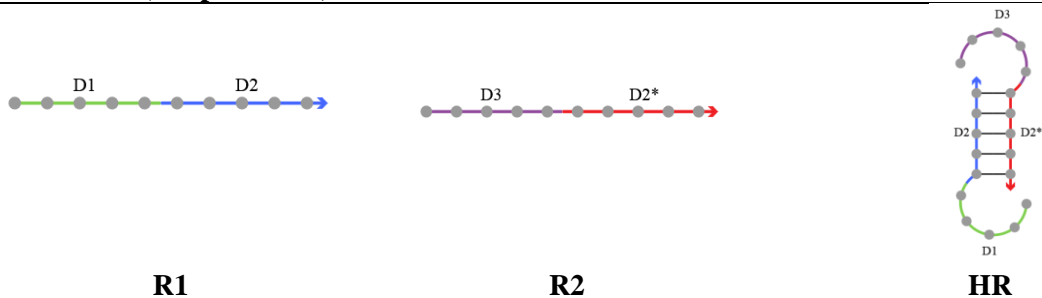


---

**Model A02 (Simple model)**


---

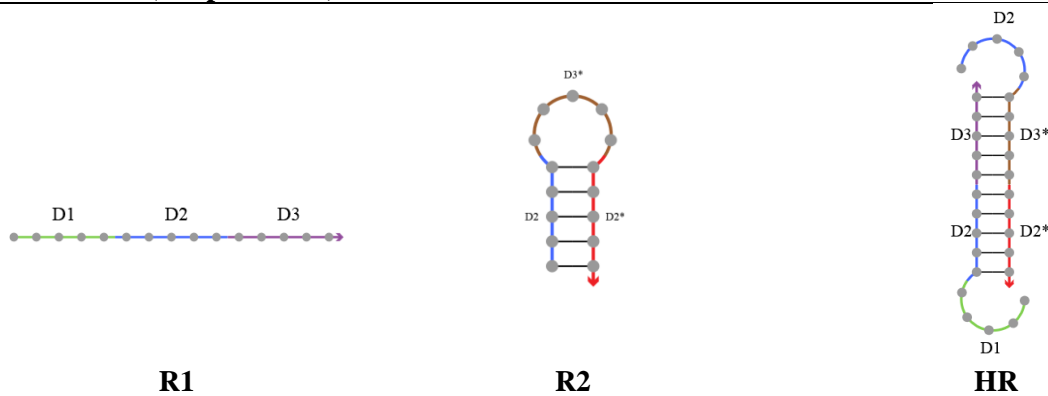


---

**Model A03 (Simple model)**


---

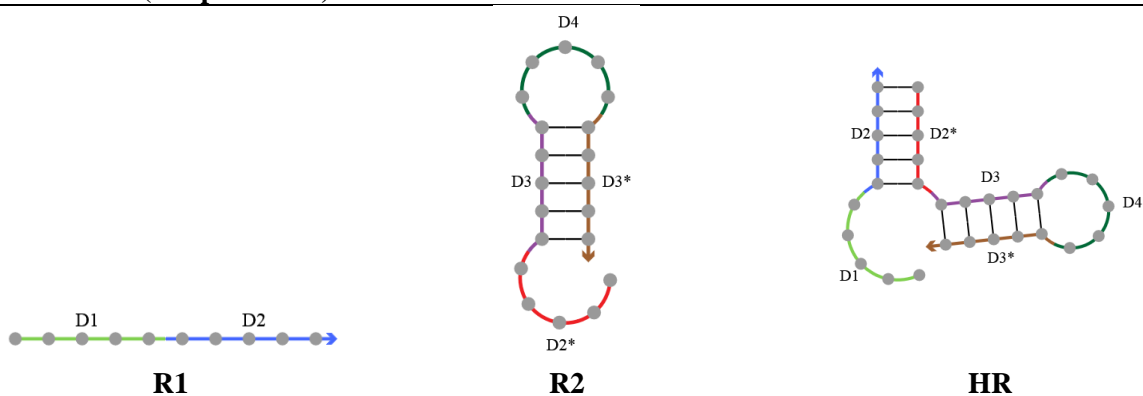


---

**Model A04 (Simple model)**


---

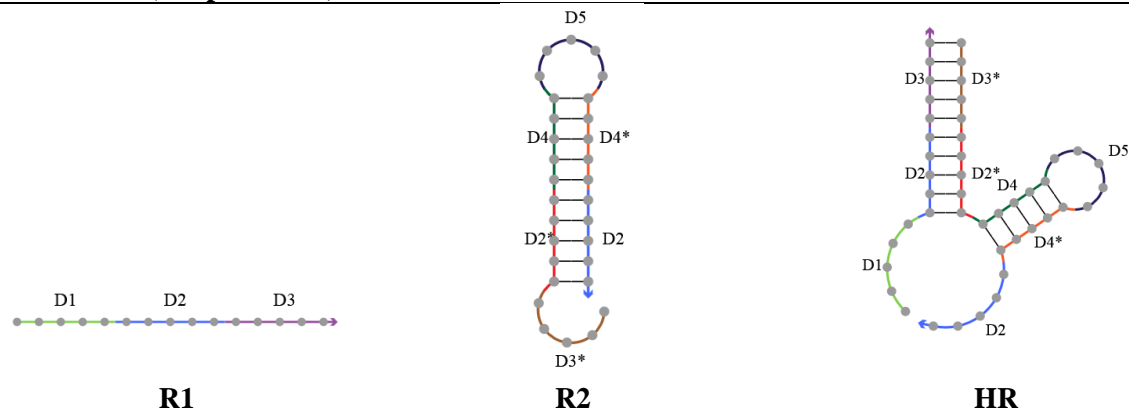

---

**Model A05 (Prion Pseudoknot)**


---

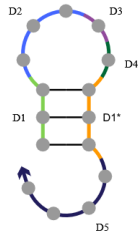**R1**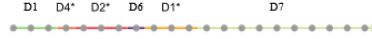**R2**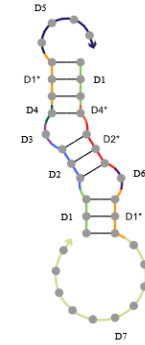**HR**


---

**Model A06 (Human astrovirus)**


---

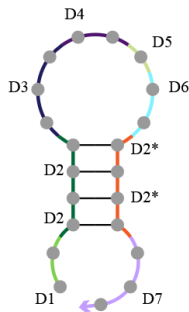**R1**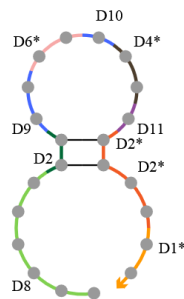**R2**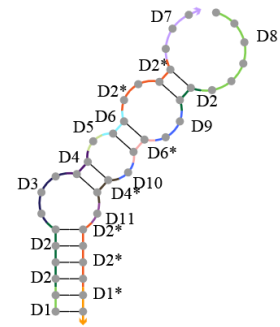**HR**


---

**Model A07 (RF00008.11)**


---

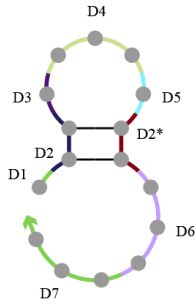**R1**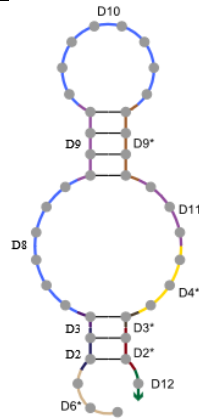**R2**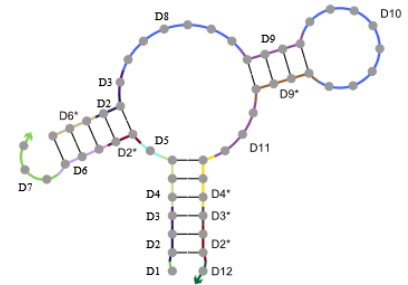**HR**

---

**Model A08 (SSD-1)**


---

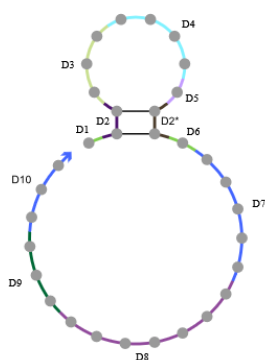**R1**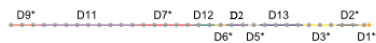**R2**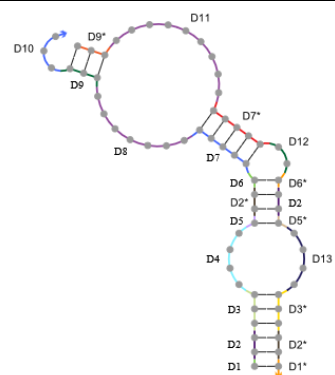**HR**


---

**Model A09 (RF00029.107)**


---

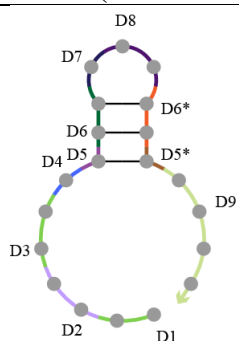**R1**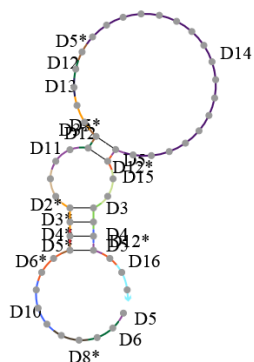**R2**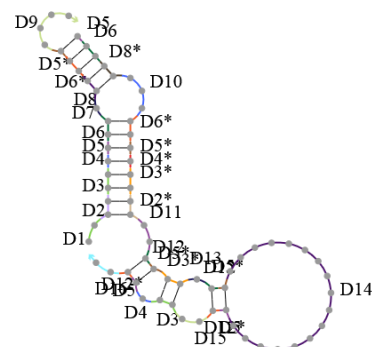**HR**


---

**Model A10 (RF00005.1)**


---

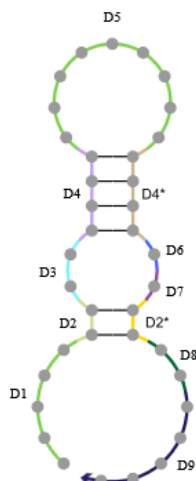**R1**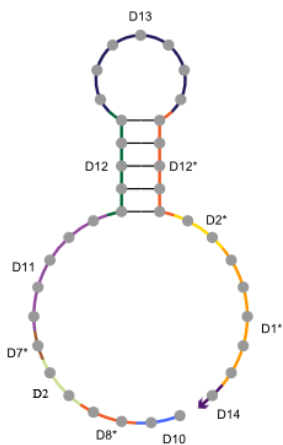**R2**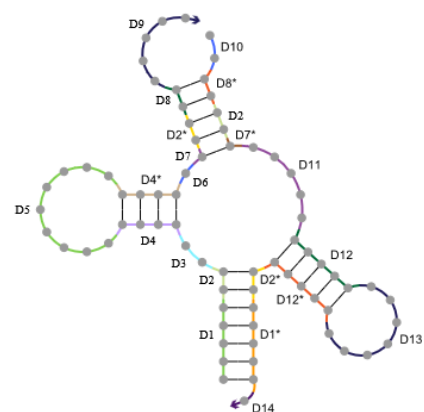**HR**

---

**Model A11 (RF00027.7)**


---

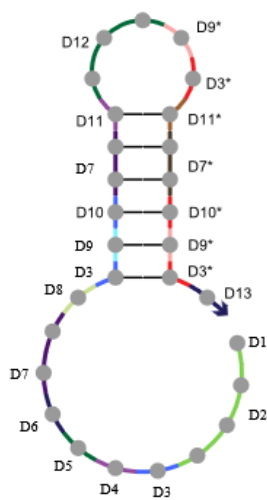**R1**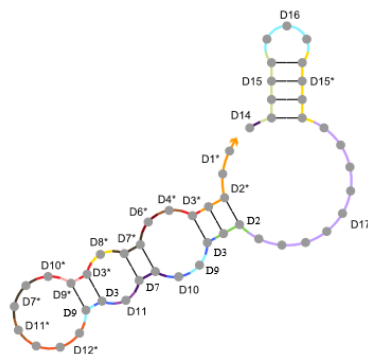**R2**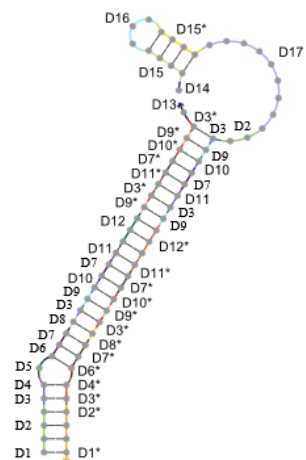**HR**


---

**Model A12 (SSD-2)**


---

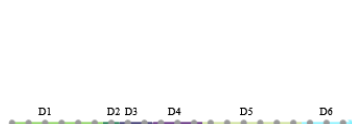**R1**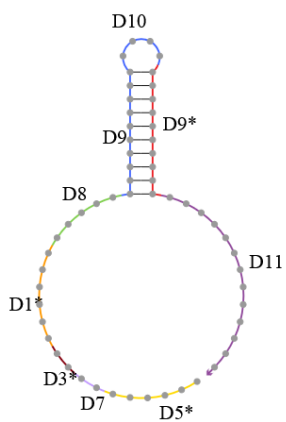**R2**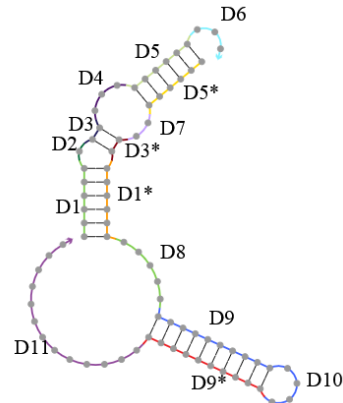**HR**


---

**Model A13 (RF00019.115)**


---

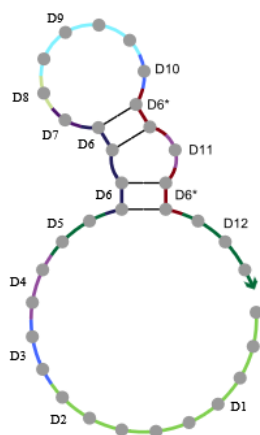**R1**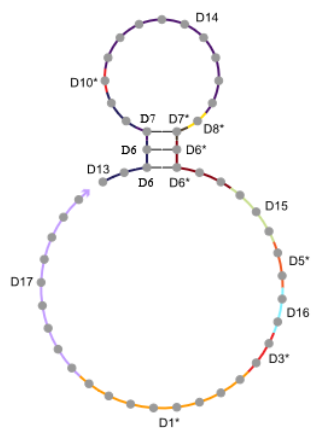**R2**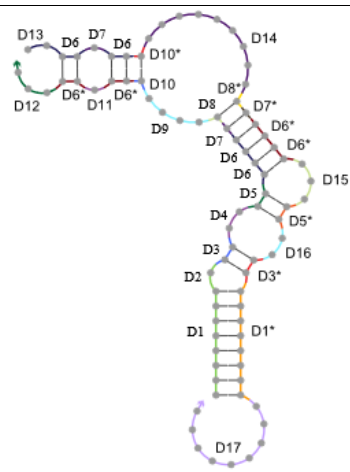**HR**

---

**Model A14 (Homo Sapiens 1 Series)**


---

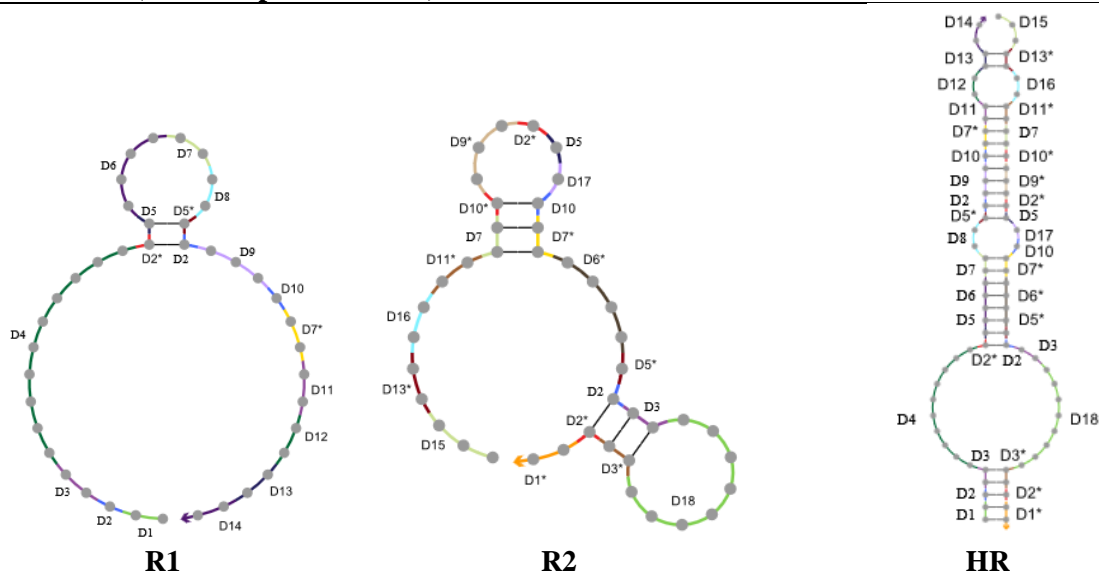


---

**Model A15 (RF00014.2)**


---

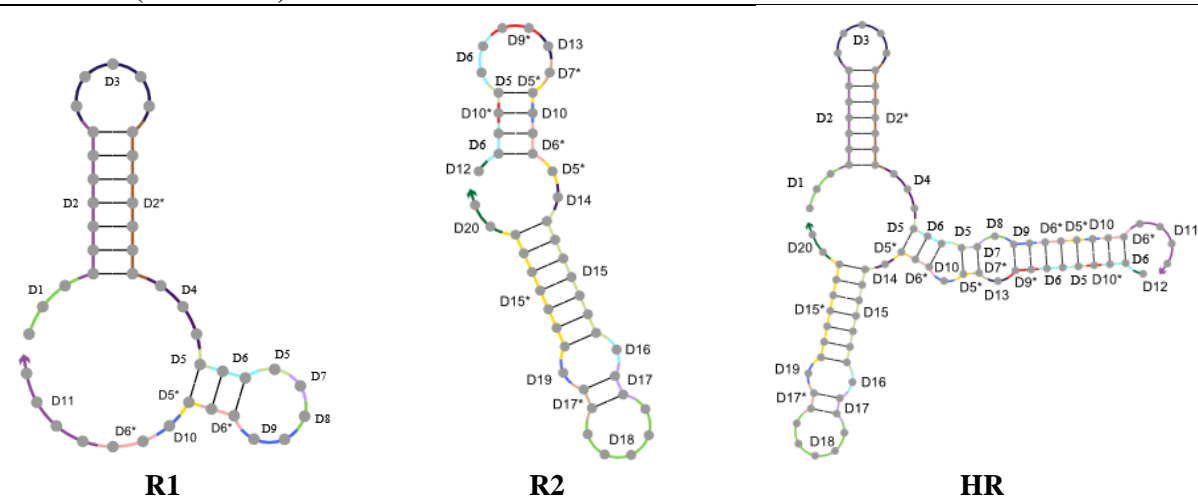


---

**Model A16 (RF00006.1)**


---

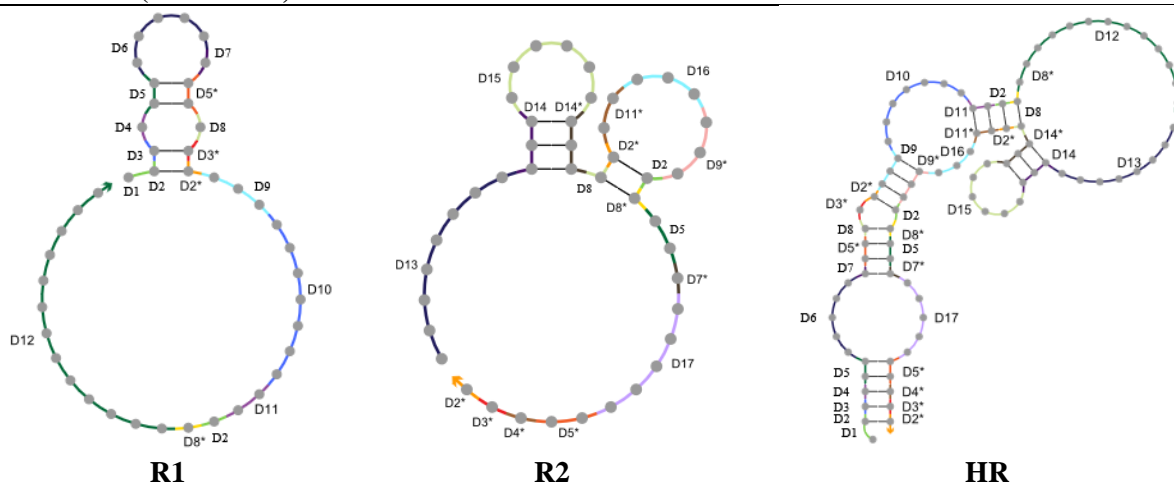



**Model A17 (RF00026.1)**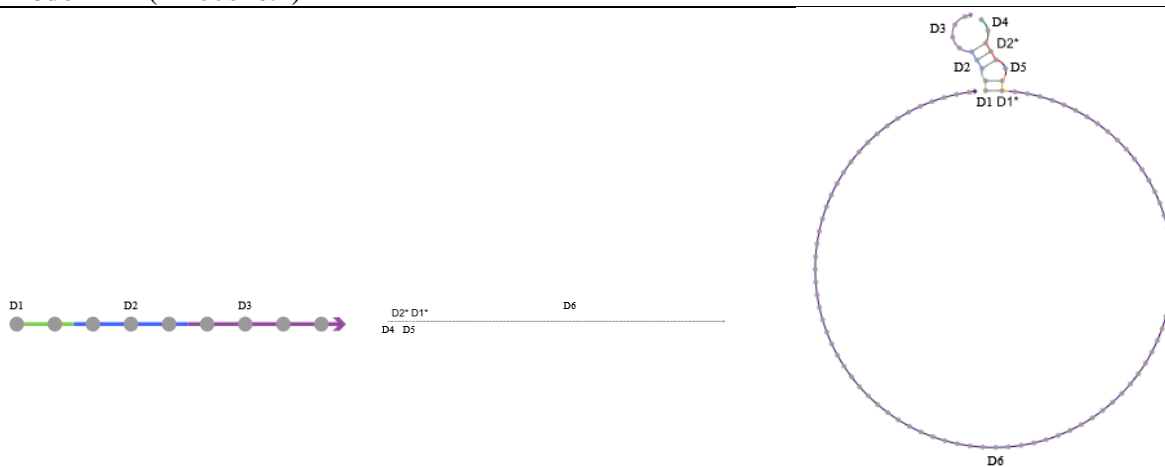

**R1**

**R2**

**HR**

### Model A18 (HIV Primer Binding Site)

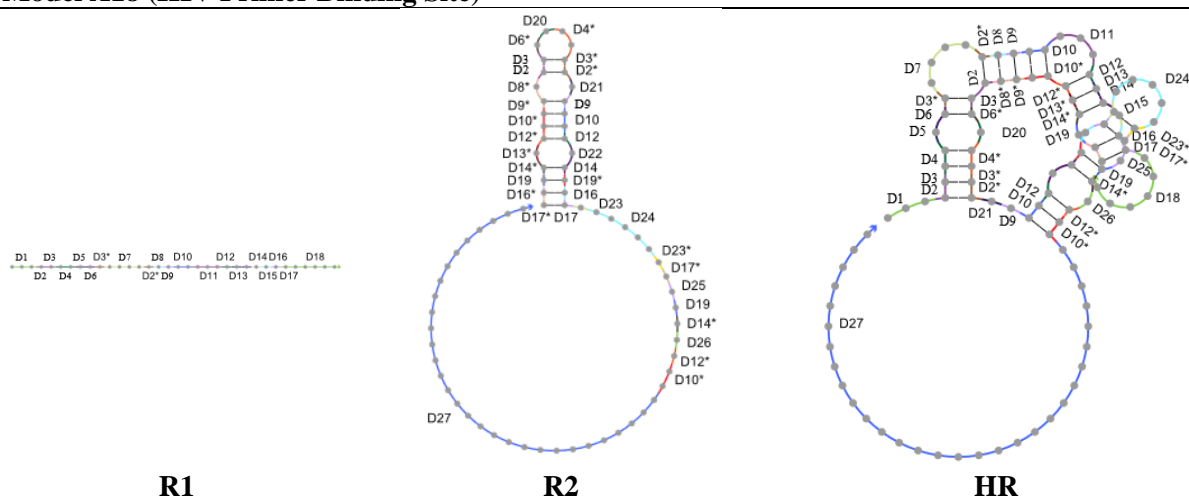

**R1**

**R2**

HR

### Model A19 (Homo Sapiens 3)

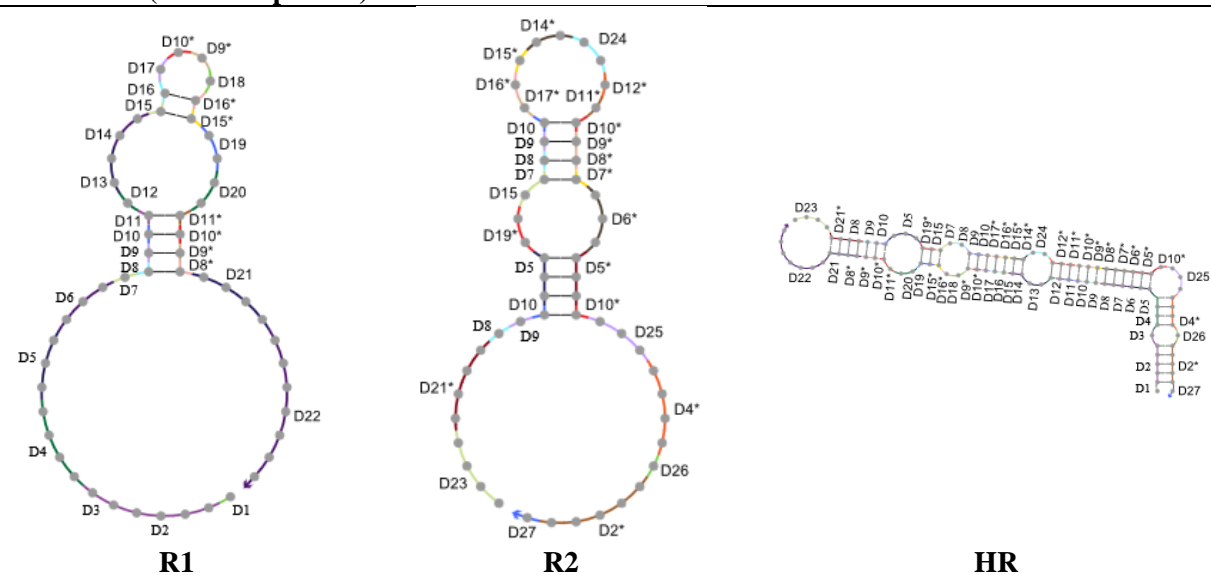

### Model A20 (Other Ribosomal RNA)

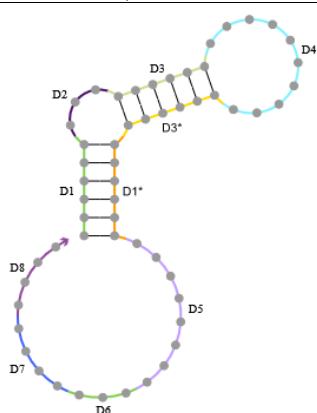

**R1**

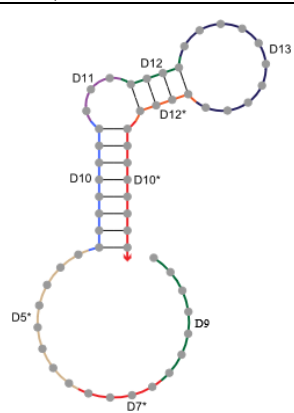

R2

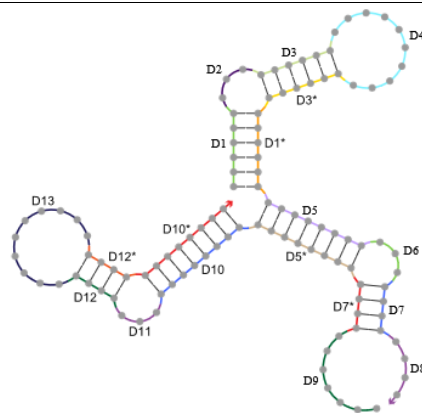

HR

---

**Model A21 (Bacillus Subtilis sRNA)**

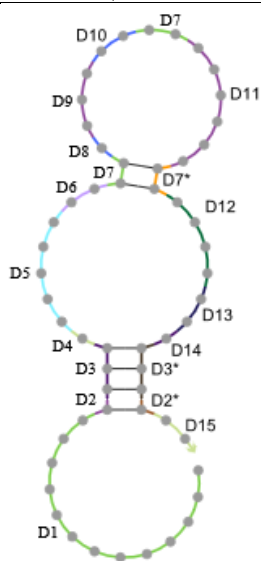

**R1**

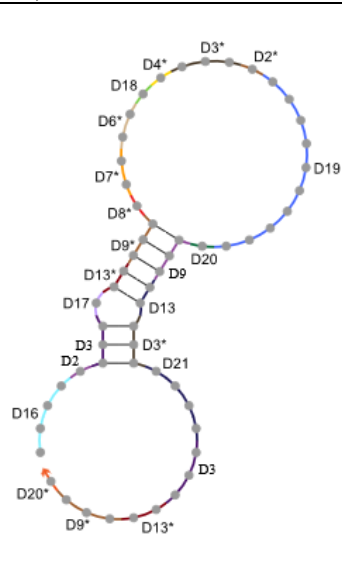

**R2**

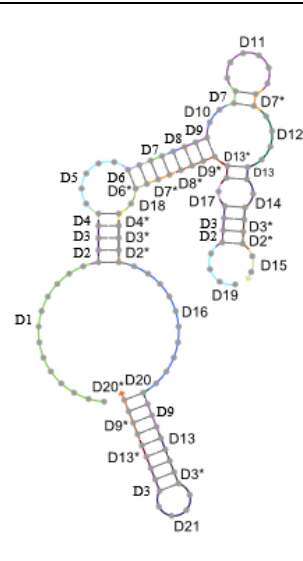**HR****Model A22 (RF00001.121)**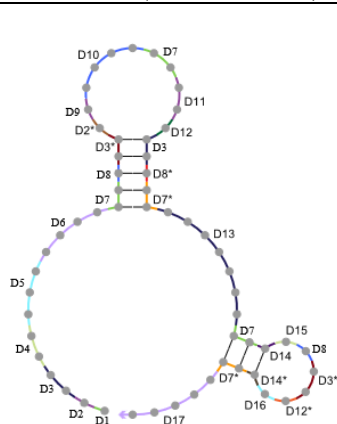

**R1**

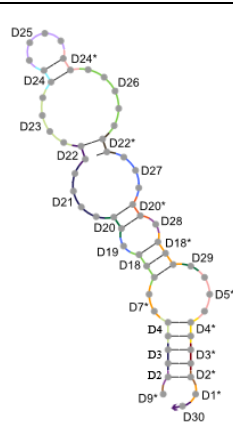

**R2**

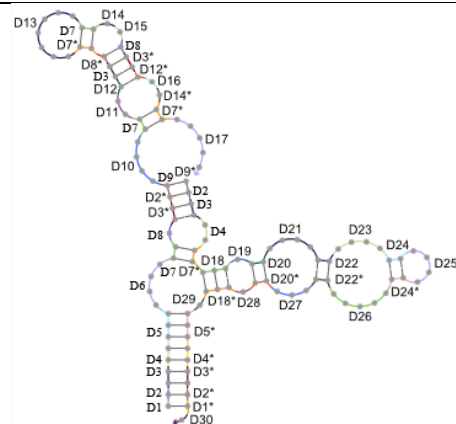**HR**

---

**Model A23 (RF00021.10)**


---

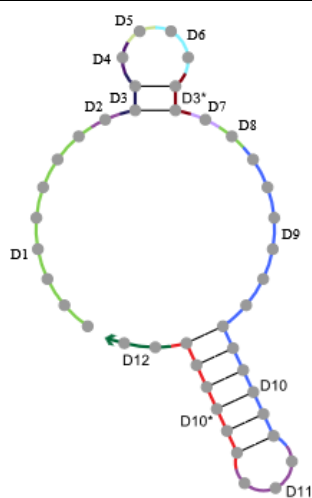**R1**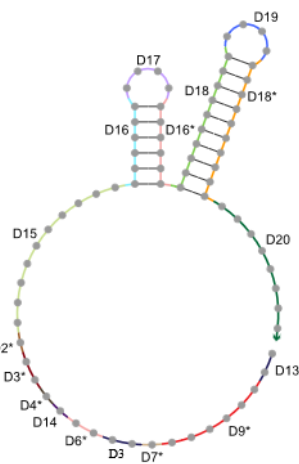**R2**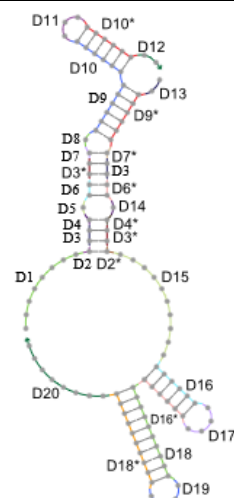**HR**


---

**Model A24 (5s Ribosomal RNA)**


---

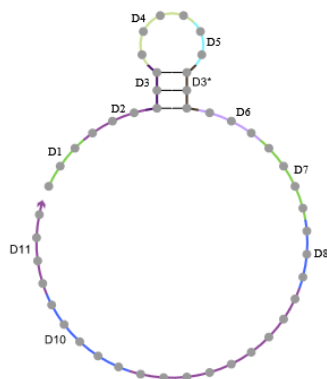**R1**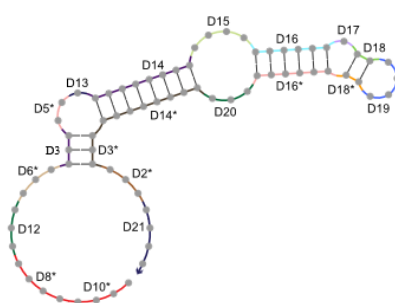**R2**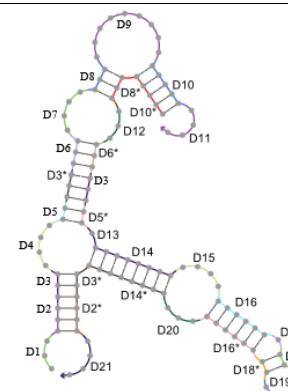**HR**


---

**Model A25 (SSD-3)**


---

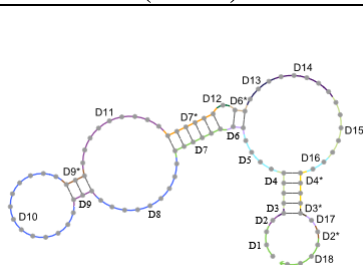**R1**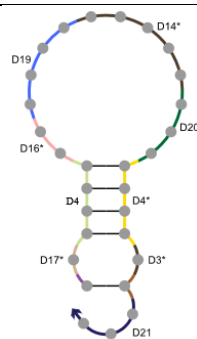**R2**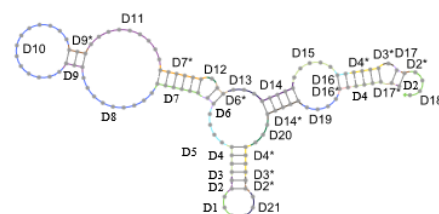**HR**

---

**Model A26 (*Tribolium Castaneum*)**


---

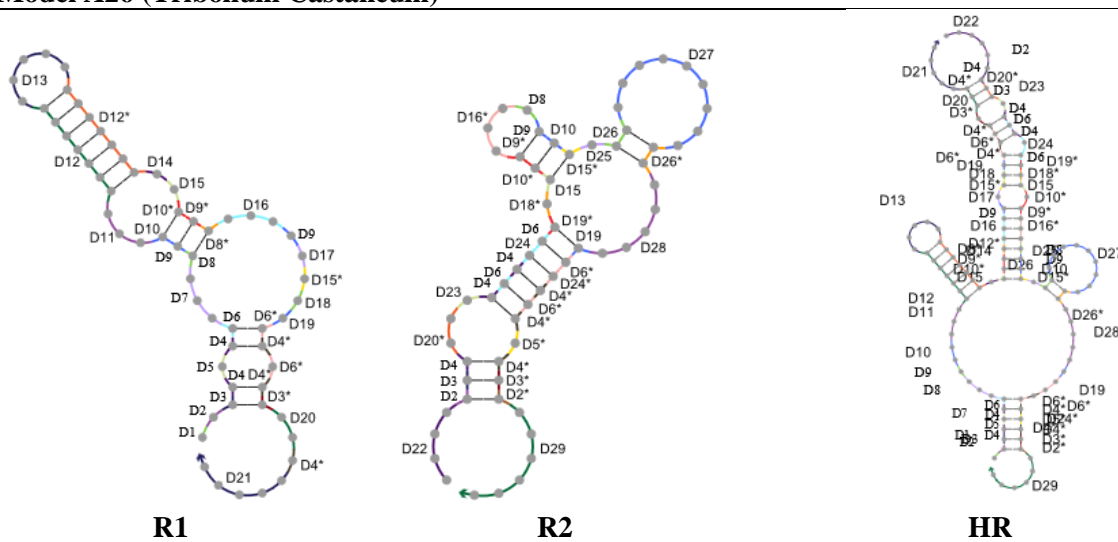


---

**Model A27 (RF00015.101)**


---

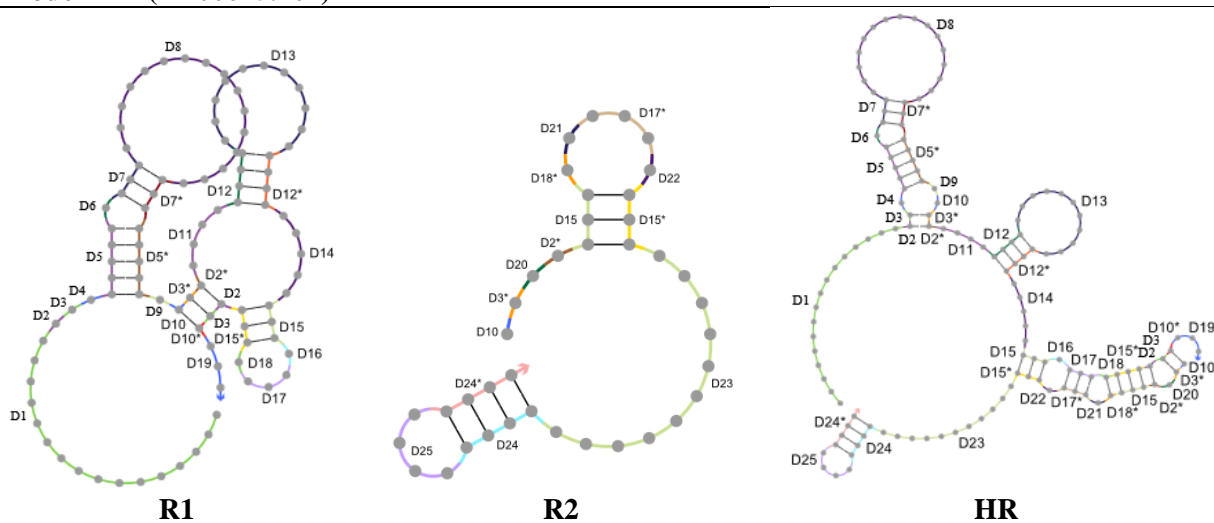


---

**Model A28 (RF00022.1)**


---

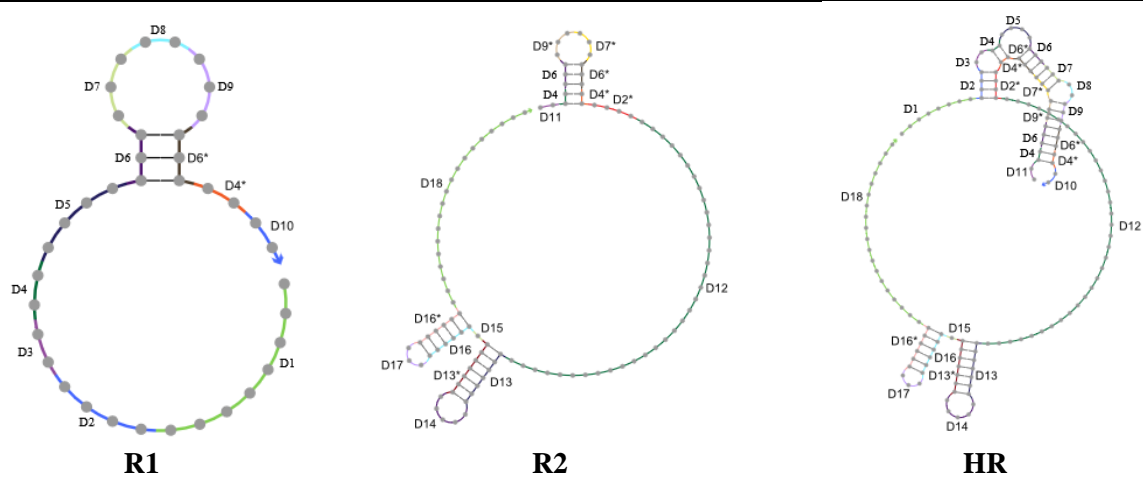

---

**Model A29 (RF00002.2)**


---

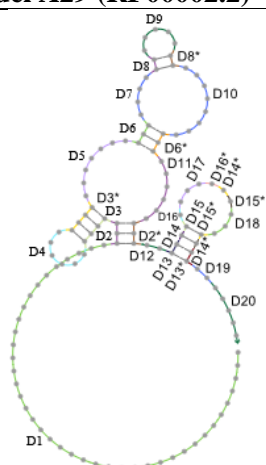**R1**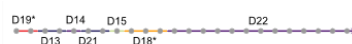**R2**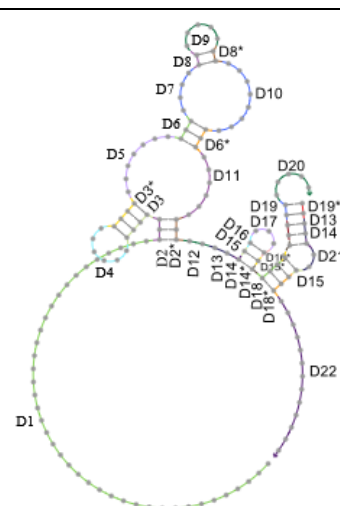**HR**


---

**Model A30 (RF00007.20)**


---

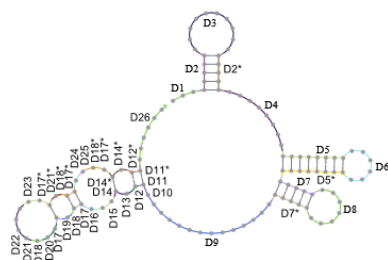**R1**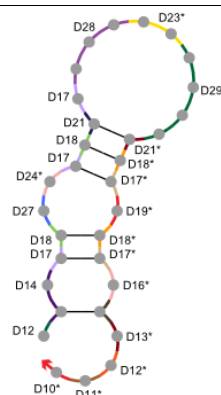**R2**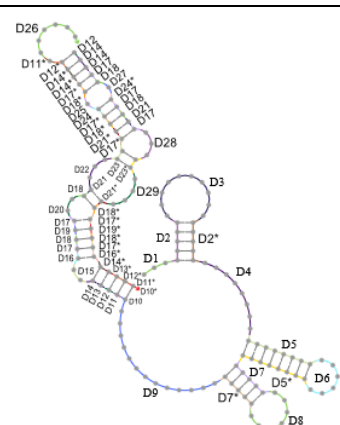**HR**


---

**Model A31 (L11935)**


---

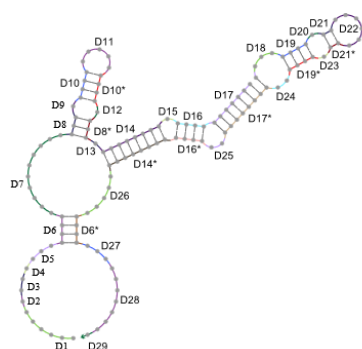**R1**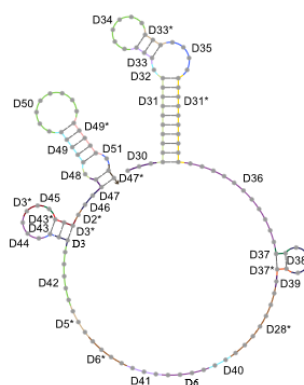**R2**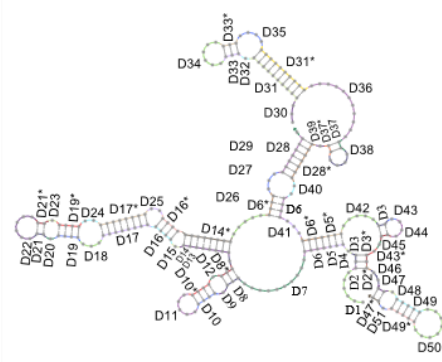**HR**



---

**Model A35 (RF00004.126)**


---

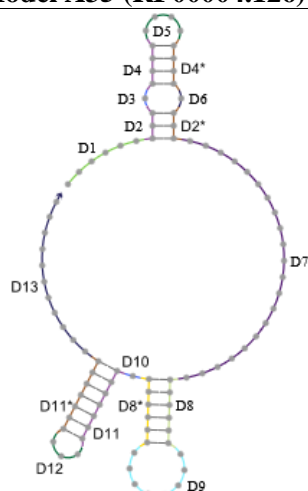**R1**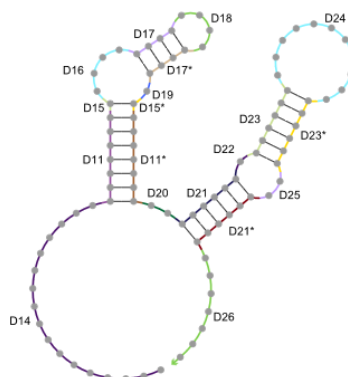**R2**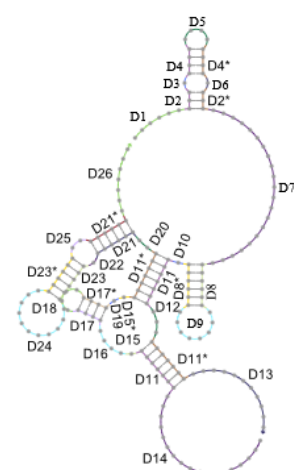**HR**


---

**Model A36 (RF00025.12)**


---

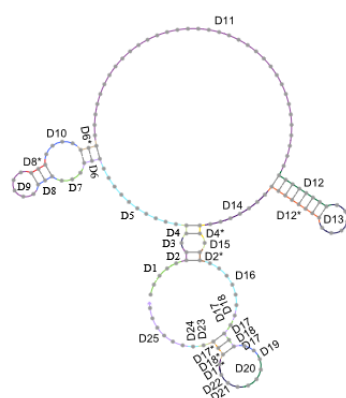**R1**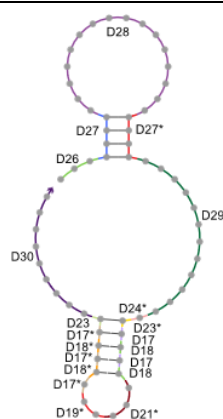**R2**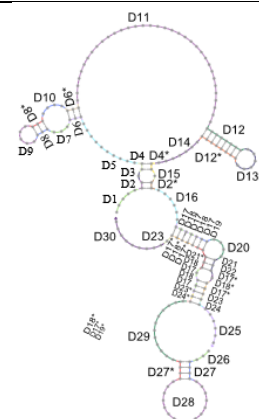

Supplement: s1 [file s1]
